# Supplementary material for: 日記に見るキルケゴールのキリスト教理解 : 「本来のキルケゴール」の問題に寄せて
Source: Hindawi journal article supplement (doi:10.1155/2012/176162), 1974-10-05

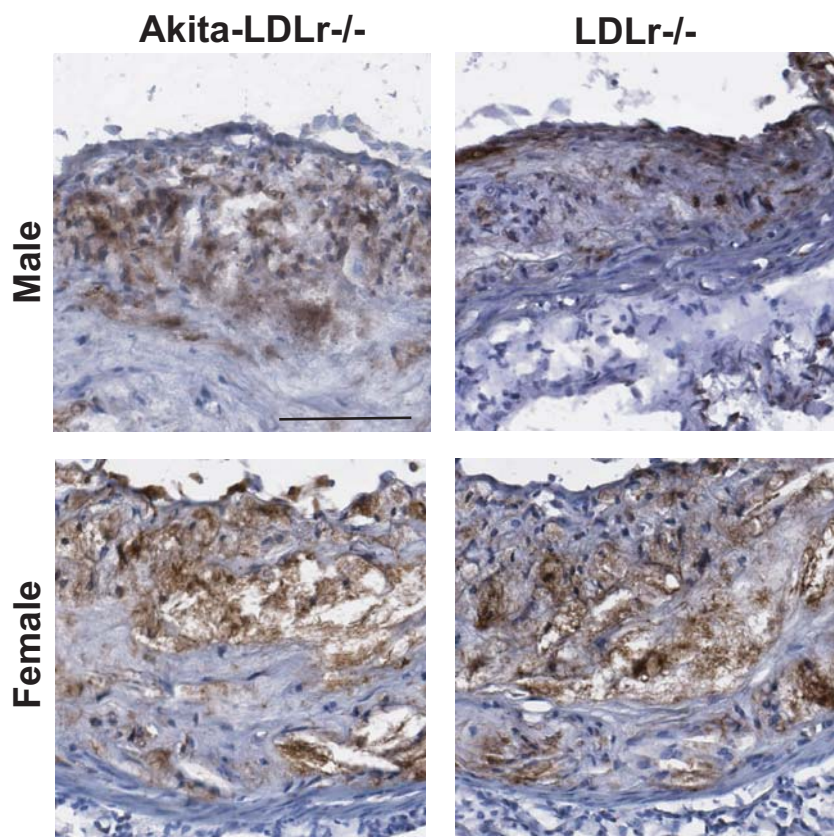

Supplement: f2 [file 176162.f2.pdf]
